# Supplementary material for: Fabrication of NiCo2O4@CeO2core@shell nanotubes with enhanced catalytic performances
Source: Royal Society of Chemistry journal article supplement (doi:10.1039/c6ce01243d), 2016-01-01
Supplement: c6ce01243d1.pdf [file c6ce01243d1.pdf]

## Supporting Information

# Fabrication of NiCo<sub>2</sub>O<sub>4</sub>@CeO<sub>2</sub> Core@shell Nanotubes with Enhanced Catalytic Performances

Zhiqiang Cheng,<sup>ab</sup> Mingyue Yu,<sup>\*c</sup> Guixia Yang<sup>a</sup> and Lijuan Kang<sup>\*a</sup>

*a College of Resources and Environment,*

*Jilin Agricultural University, Changchun, 130118, PR China;*

*b School of Aerospace Engineering, Tsinghua University, Beijing, 100000, PR China;*

*c Changchun University of Science and Technology,*

*Changchun, 130000, PR China.*

*E-mail: mingyue141210@126.com, kanglijuan61@126.com*

## Experimental Section:

**NiCo-LDH precursors:** the synthetic process is according to the previous report by Lou's group.<sup>31</sup> Typically, 0.5 mmol of  $\text{Ni}(\text{Ac})_2 \cdot 4\text{H}_2\text{O}$  and 1 mmol of  $\text{Co}(\text{Ac})_2 \cdot 4\text{H}_2\text{O}$  are dissolved into 3 mL of 1,3-propanediol completely. Then, 47 mL of isopropanol is added into the above solution to form a pink solution. Thereafter, the resulting mixture is transferred into a Teflon-lined stainless steel autoclave and kept at 160 °C for 12 h. Finally, the NiCo-LDH precursors are collected by centrifugation.

For pure Ni or Co hydroxides, the synthetic method is similarly with NiCo-LDH, the only difference is using 1.5 mmol  $\text{Ni}(\text{Ac})_2 \cdot 4\text{H}_2\text{O}$  or 1.5 mmol of  $\text{Co}(\text{Ac})_2 \cdot 4\text{H}_2\text{O}$  to replace 0.5 mmol of  $\text{Ni}(\text{Ac})_2 \cdot 4\text{H}_2\text{O}$  and 1 mmol of  $\text{Co}(\text{Ac})_2 \cdot 4\text{H}_2\text{O}$  in the reaction solution.

**$\text{NiCo}_2\text{O}_4$ ,  $\text{Co}_3\text{O}_4$  and NiO products:** The as-obtained precursors are heated in air directly at 300 °C for one hours (1 °C/min).

**$\text{NiCo}_2\text{O}_4@ \text{CeO}_2$  core@shell nanotubes:** 60 mg  $\text{NiCo}_2\text{O}_4$  nanotubes is first dispersed in a mixture contained 20 mL water and 20 mL ethanol. Then, 2 mL  $\text{Ce}(\text{NO}_3)_3$  aqueous solution (0.1 M) and 3 mL hexamethylenetetramine aqueous solution (HMT, 0.1 M) are added in turn, followed by a heating treatment at 70 °C for two hours. Then the as-obtained products are purified by centrifugation, and washed with water and ethanol for two times.

$\text{Co}_3\text{O}_4@ \text{CeO}_2$  and  $\text{NiO}@ \text{CeO}_2$  core@shell samples are synthesized via the similar process expect by using  $\text{Co}_3\text{O}_4$  and NiO sample to replace  $\text{NiCo}_2\text{O}_4$  samples at the start of the synthetic reaction, respectively.

**Characterization:** The X-ray diffraction patterns of the products were collected on a Rigaku-D/max 2500 V X-ray diffractometer with  $\text{Cu-K}\alpha$  radiation ( $\lambda = 1.5418 \text{ \AA}$ ), with an operation voltage and current maintained at 40 kV and 40 mA. Transmission electron microscopic (TEM) images were obtained with a TECNAI G2 high-resolution transmission electron microscope operating at 200 kV. XPS measurement was performed on an ESCALAB-MKII 250 photoelectron spectrometer (VG Co.) with  $\text{Al K}\alpha$  X-ray radiation as the X-ray source for excitation.

**Catalytic test:** 50 mg catalysts are put in a stainless steel reaction tube. The experiment is carried out under a flow of reactant gas mixture (1% CO, 99% air) at a rate of 50 mL/min.

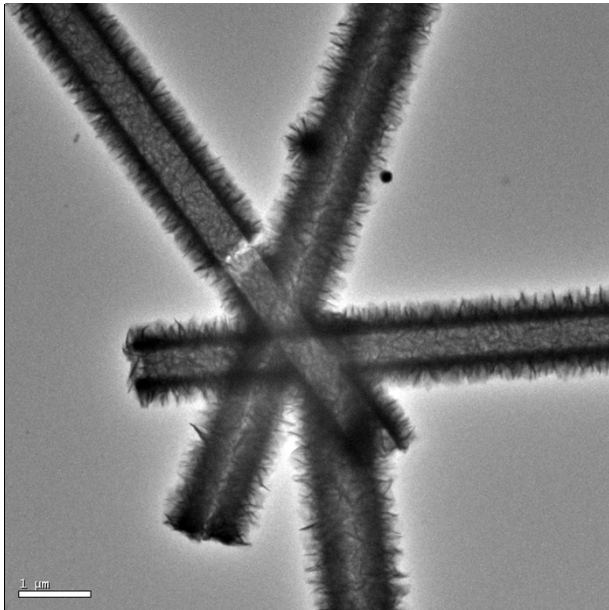

**Figure S1.** TEM image of the as-obtained NiCo-LDH nanotubes.

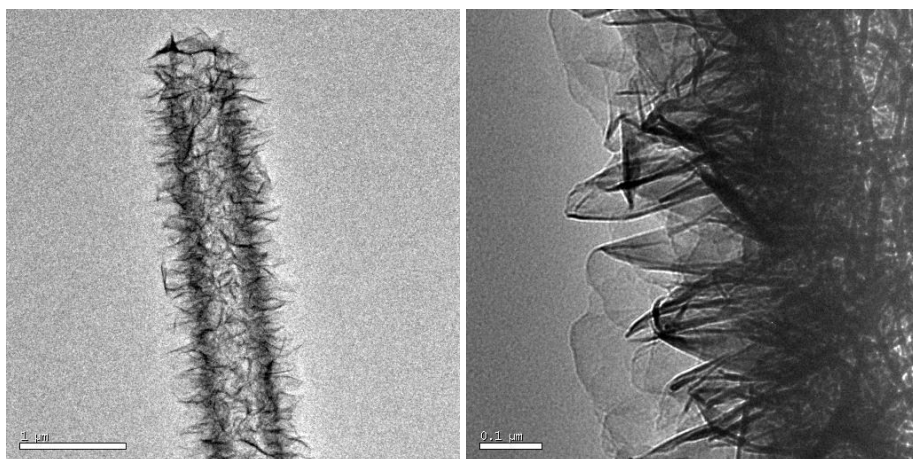

**Figure S2.** TEM images of NiCo<sub>2</sub>O<sub>4</sub> nanotubes obtained by annealing NiCo-LDH at 300 °C for 1 hours.

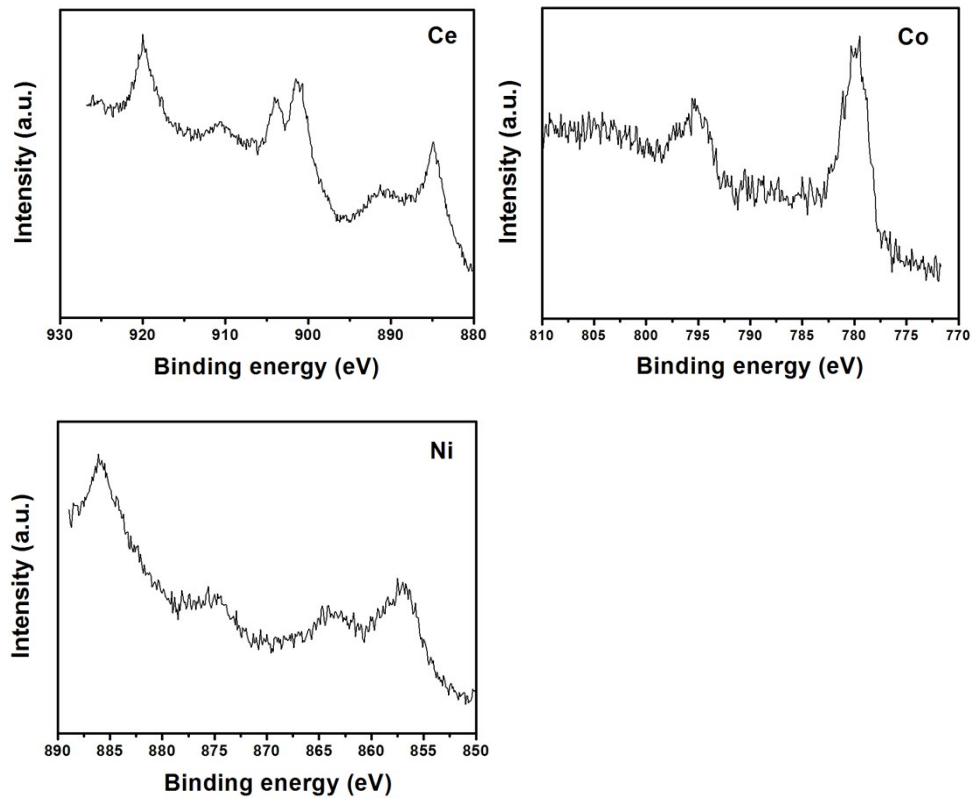

**Figure S3.** XPS data of NiCo<sub>2</sub>O<sub>4</sub>@CeO<sub>2</sub>-2 core@shell nanotubes.

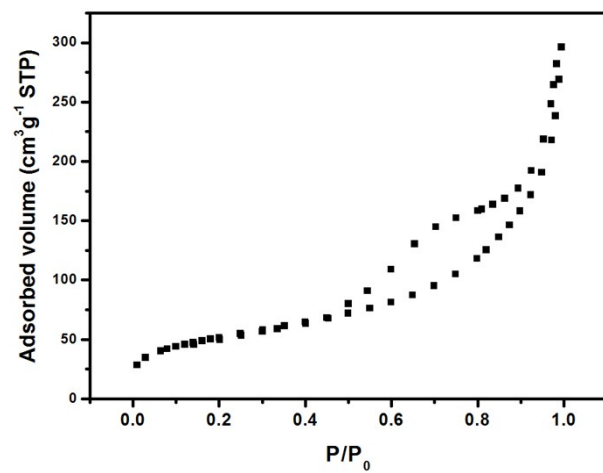

**Figure S4.** BET data of NiCo<sub>2</sub>O<sub>4</sub>@CeO<sub>2</sub>-2 core@shell nanotubes.

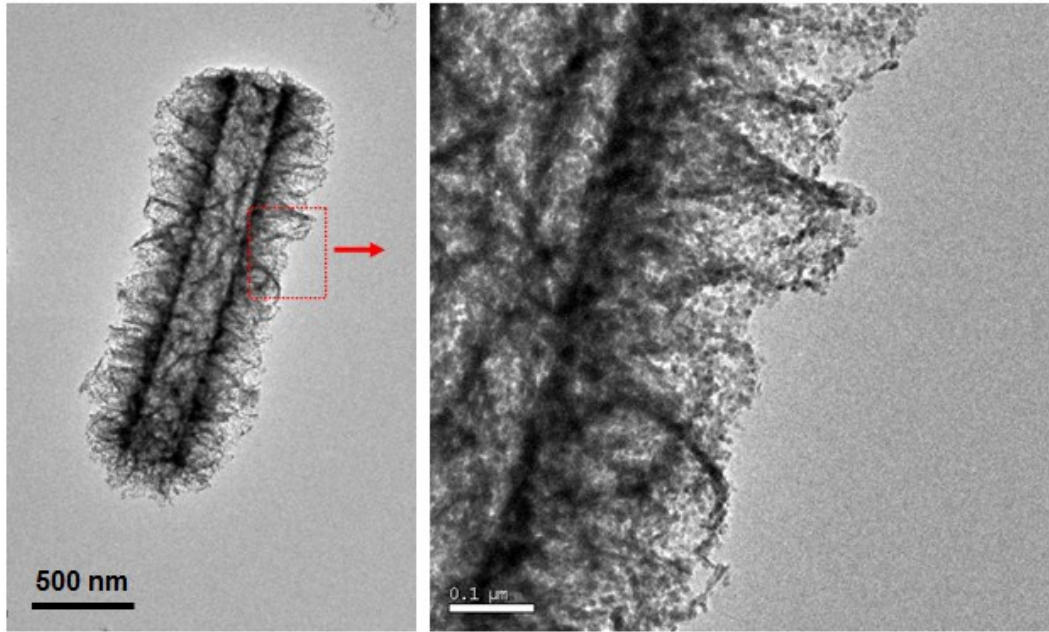

**Figure S5.** TEM images of NiCo<sub>2</sub>O<sub>4</sub>@CeO<sub>2</sub>-1 core@shell nanotubes.

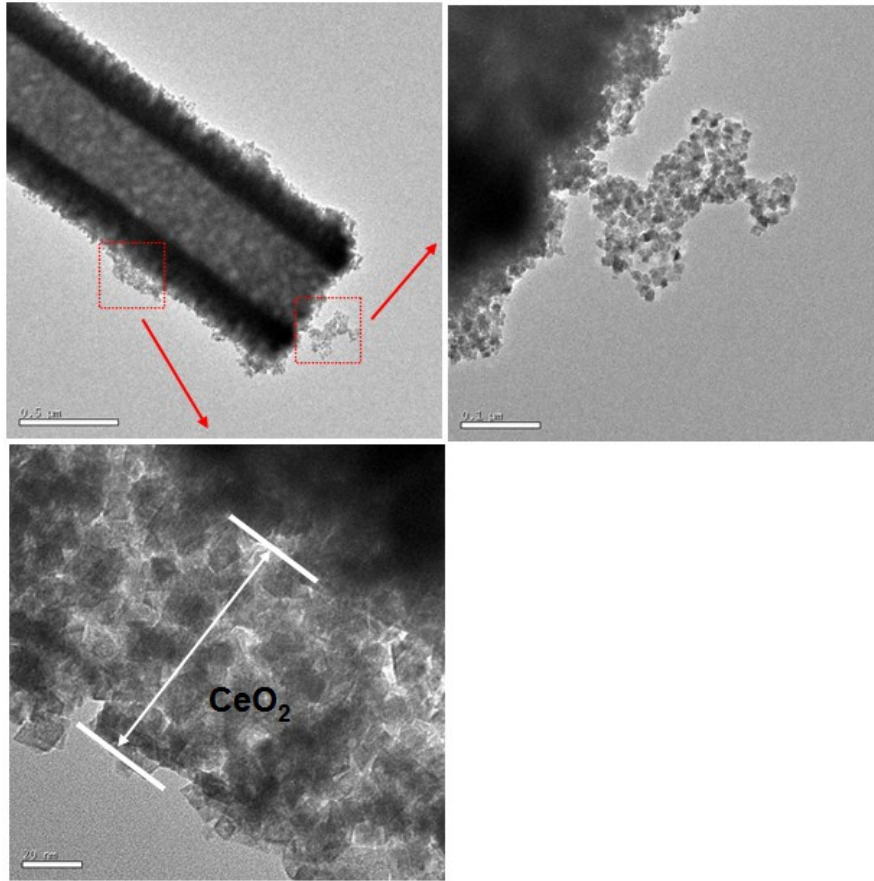

**Figure S6.** TEM images of  $\text{NiCo}_2\text{O}_4@ \text{CeO}_2$ -3 core@shell nanotubes.



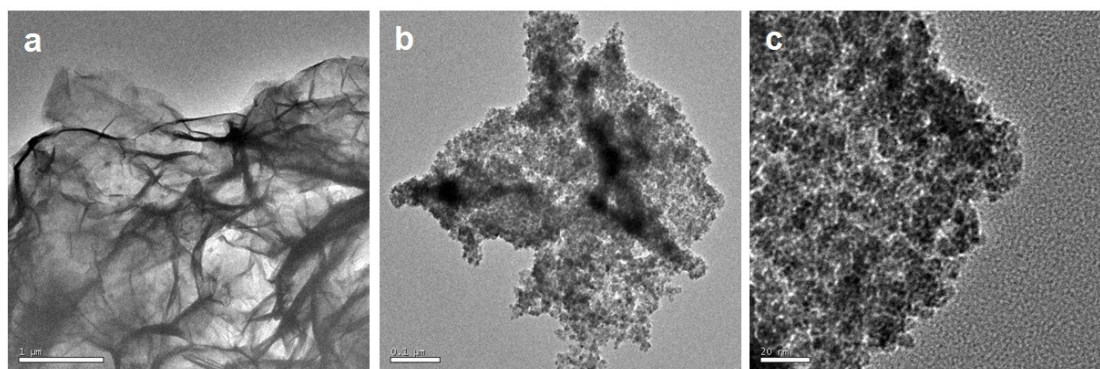

**Figure S7.** TEM images of  $\text{Co}_3\text{O}_4$  nanosheets (a) and  $\text{Co}_3\text{O}_4@ \text{CeO}_2$  core@shell samples (b and c).

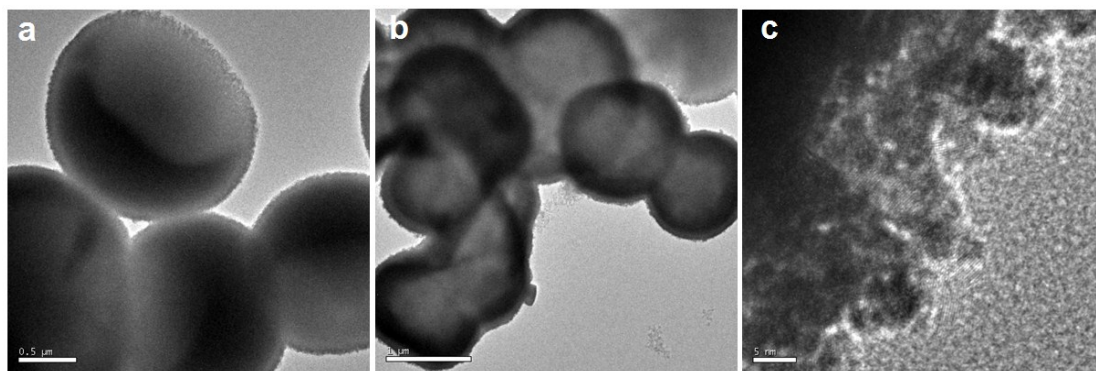

**Figure S8.** TEM images of NiO nanospheres (a) and NiO@CeO<sub>2</sub> core@shell samples (b and c).

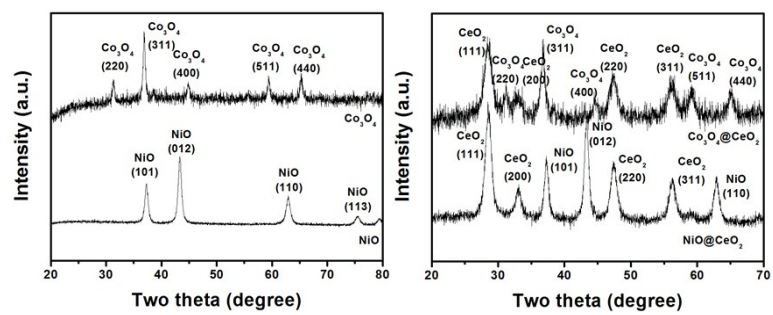

**Figure S9.** XRD data of the as-obtained NiO, Co<sub>3</sub>O<sub>4</sub>, NiO@CeO<sub>2</sub> and NiCo<sub>2</sub>O<sub>4</sub>@CeO<sub>2</sub> samples.

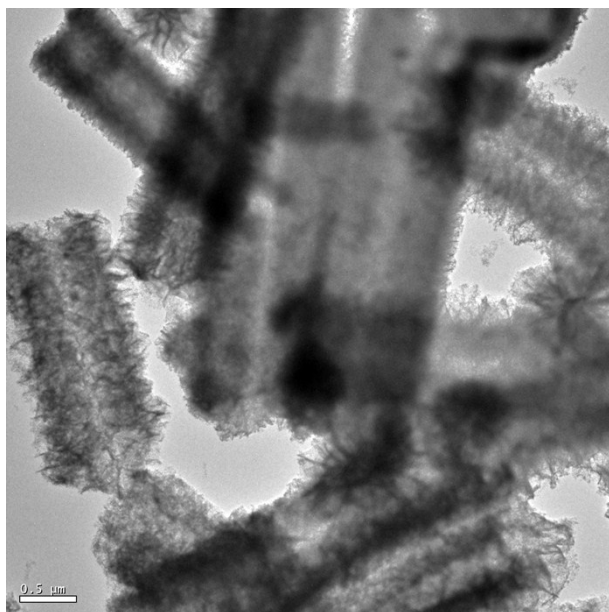

**Figure S10.** TEM image of NiCo<sub>2</sub>O<sub>4</sub>@CeO<sub>2</sub>-2 sample after the catalytic test.

|                                                       | NiCo <sub>2</sub> O <sub>4</sub> content (wt %) | CeO <sub>2</sub> content (wt %) |
|-------------------------------------------------------|-------------------------------------------------|---------------------------------|
| NiCo <sub>2</sub> O <sub>4</sub> @CeO <sub>2</sub> -1 | 83.3                                            | 16.7                            |
| NiCo <sub>2</sub> O <sub>4</sub> @CeO <sub>2</sub> -2 | 64.7                                            | 35.3                            |
| NiCo <sub>2</sub> O <sub>4</sub> @CeO <sub>2</sub> -3 | 57.2                                            | 42.8                            |

**Table S1.** NiCo<sub>2</sub>O<sub>4</sub> and CeO<sub>2</sub> contents in the as-obtained three kinds of core@shell nanostructures calculated from the ICP results.
